# Supplementary material for: Effect of normal stress on the friction of brucite: Application to slow earthquake in the mantle wedge
Source: Copernicus journal article supplement (doi:10.5194/se-2020-144), 2020-08-26
Supplement: Supplementary file 1 [file SI_v20200729.docx]

Supporting information for:

Effect of normal stress on the friction of brucite: Application to slow earthquake in the mantle wedge

Hanaya Okuda1,2, Ikuo Katayama3, Hiroshi Sakuma4, Kenji Kawai1

1Department of Earth and Planetary Science, School of Science, University of Tokyo, Bunkyo, 113-0033 Tokyo, Japan

2Department of Ocean Floor Geoscience, Atmosphere and Ocean Research Institute, University of Tokyo, Kashiwa, 277-8564 Chiba, Japan

3Department of Earth and Planetary Systems Science, School of Science, Hiroshima University, Higashi-Hiroshima, 739-8526 Hiroshima, Japan

4Research Center for Functional Materials, National Institute for Materials Science, Tsukuba, 305-0044 Ibaraki, Japan

*Correspondence to:* Hanaya Okuda (okuda@aori.u-tokyo.ac.jp)

This supporting information includes one figure (Figure S1). For the data set (Table S1), see attached TableS1.csv file.


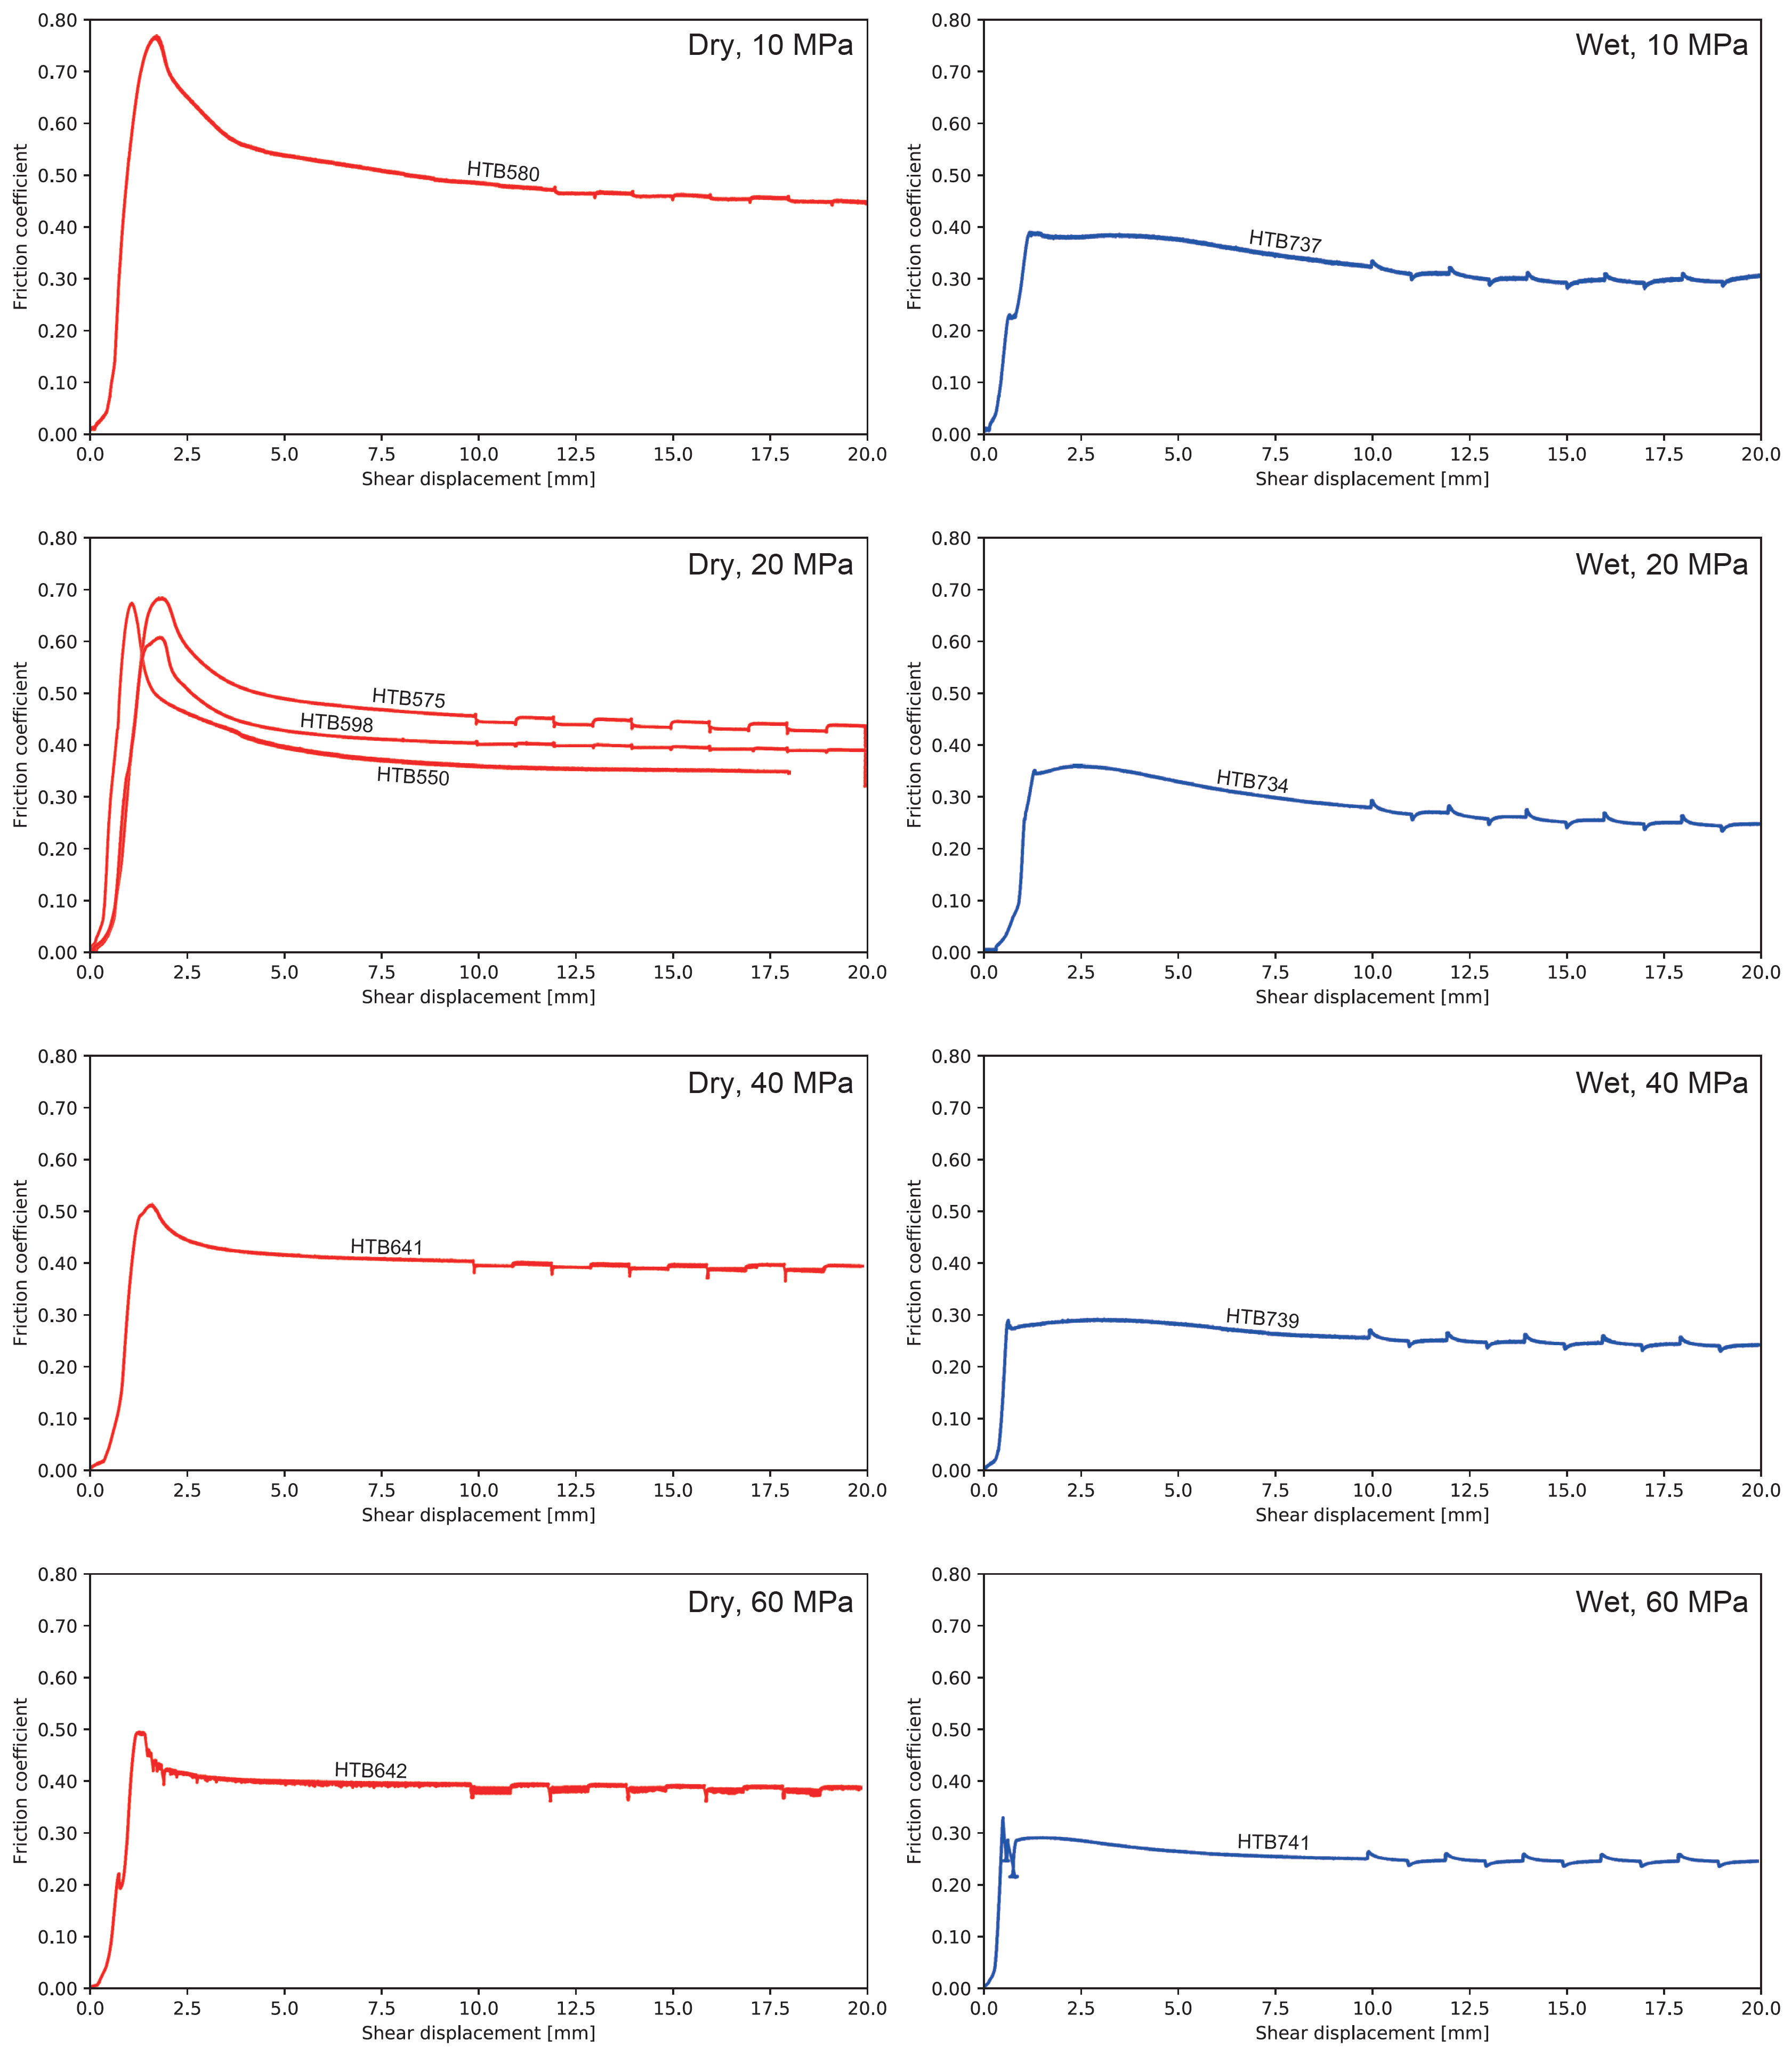


Figure S1. Experimental data for each normal stress.
